# Supplementary material for: Solution Combustion Synthesis of High-Performance Nano-LiFePO4/C Cathode Material from Cost-Effective Mixed Fuels
Source: MDPI journal article supplement (doi:10.3390/ma16227155), 2023-11-14
Supplement: s1 [file s1]

## Results

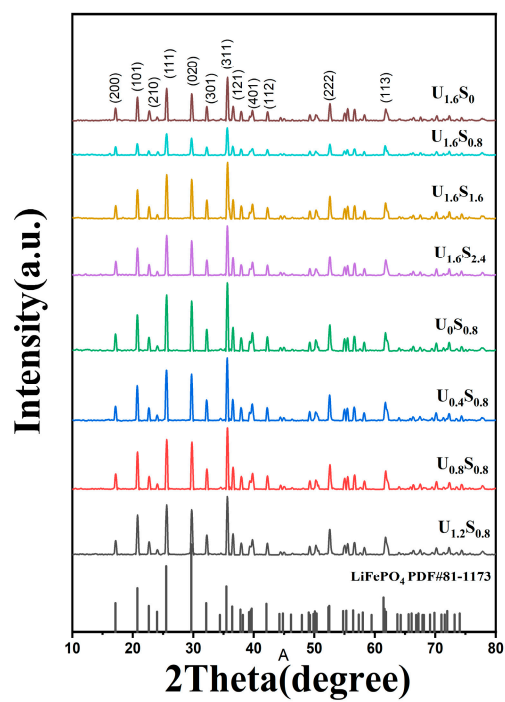

Figure S1. XRD patterns of  $\text{LiFePO}_4$  powders.

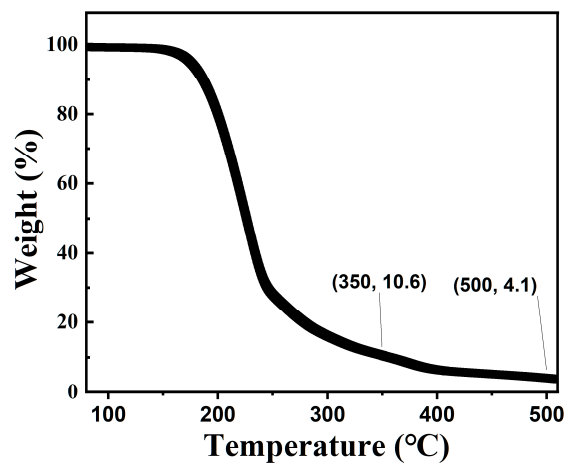

Figure S2. The TG curve of urea/sorbitol mixed fuels in air atmosphere.

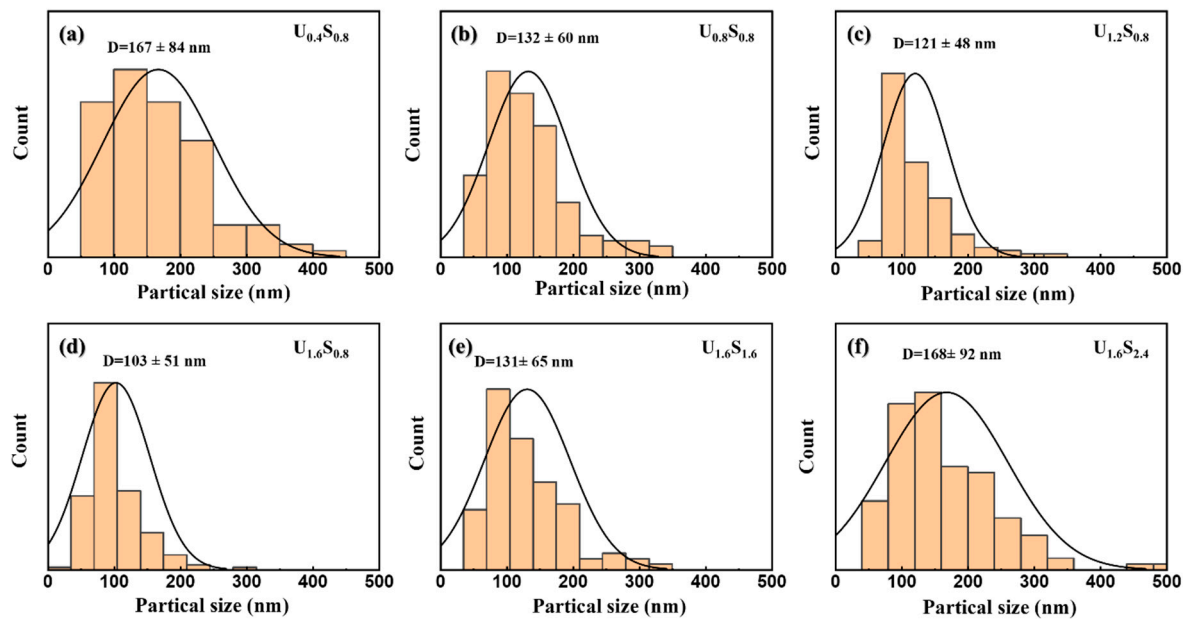

Figure S3. Particle distribution plots of Nano-LiFePO<sub>4</sub>/C samples. (a) U<sub>0.4</sub>S<sub>0.8</sub>; (b) U<sub>0.8</sub>S<sub>0.8</sub>; (c) U<sub>1.2</sub>S<sub>0.8</sub>; (d) U<sub>1.6</sub>S<sub>0.8</sub>; (e) U<sub>1.6</sub>S<sub>1.6</sub>; (f) U<sub>1.6</sub>S<sub>2.4</sub>.

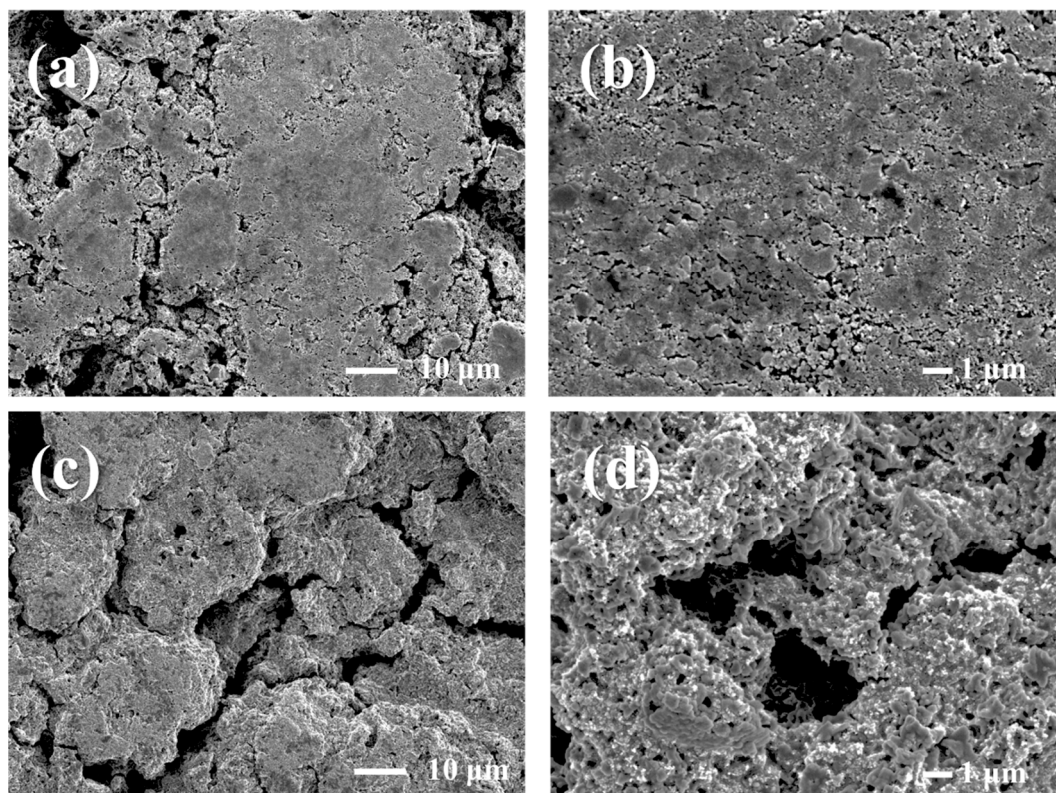

Figure S4. The morphology of U<sub>1.6</sub>S<sub>0.8</sub> electrode (a,b) before and (c,d) after cycling at 1C for 220 cycles.

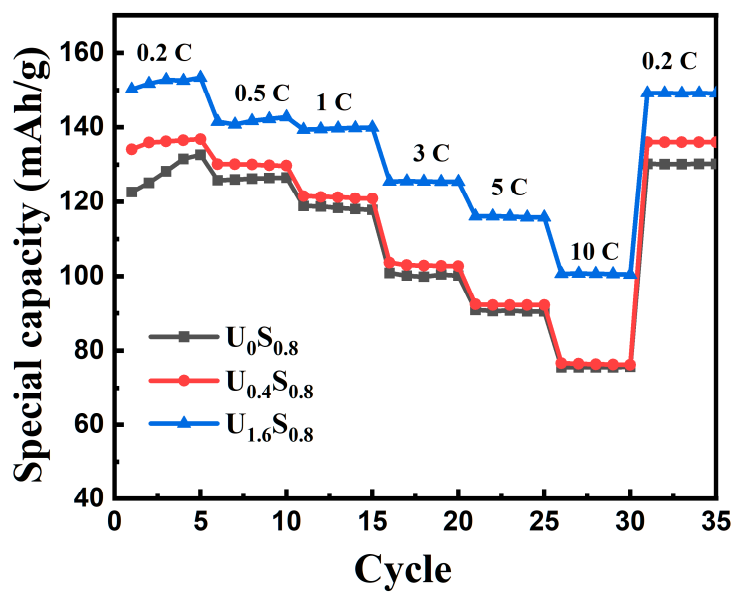

Figure S5. The rate performance of Nano-LiFePO<sub>4</sub>/C samples.

Table S1. The electronic conductivity of as-calcined LiFePO<sub>4</sub>/C samples.

| Sample                            | Resistivity/ $\Omega \cdot \text{mm}$ | Conductivity/ $\text{S} \cdot \text{mm}^{-1}$ |
|-----------------------------------|---------------------------------------|-----------------------------------------------|
| U <sub>0.4</sub> S <sub>0.8</sub> | 1736                                  | $5.76 \times 10^{-4}$                         |
| U <sub>0.8</sub> S <sub>0.8</sub> | 988                                   | $1.01 \times 10^{-3}$                         |
| U <sub>1.2</sub> S <sub>0.8</sub> | 591                                   | $1.69 \times 10^{-3}$                         |
| U <sub>1.6</sub> S <sub>0.8</sub> | 137                                   | $7.30 \times 10^{-3}$                         |
| U <sub>1.6</sub> S <sub>1.6</sub> | 87                                    | $1.15 \times 10^{-2}$                         |
| U <sub>1.6</sub> S <sub>2.4</sub> | 95                                    | $10.51 \times 10^{-2}$                        |

Table S2. Calculation of  $D_{Li+}$  of  $LiFePO_4/C$  samples.

| Samples          | $\sigma/\Omega S^{-0.5}$ | $D_{Li+}/cm^2s^{-1}$ |
|------------------|--------------------------|----------------------|
| $U_{0.4}S_{0.8}$ | 35                       | 4.60073E-14          |
| $U_{0.8}S_{0.8}$ | 53                       | 2.00637E-14          |
| $U_{1.2}S_{0.8}$ | 45                       | 2.78316E-14          |
| $U_{1.6}S_{0.8}$ | 28                       | 7.18864E-14          |
| $U_{1.6}S_0$     | 37                       | 4.11679E-14          |
| $U_{1.6}S_{1.6}$ | 29                       | 6.84225E-14          |
| $U_{1.6}S_{2.4}$ | 30                       | 6.2621E-14           |
